# Supplementary material for: Integrating Straw Management and Seeding to Improve Seed Yield and Reduce Environmental Impacts in Soybean Production
Source: MDPI journal article supplement (doi:10.3390/agronomy11061033), 2021-05-21
Supplement: s1 [file s1]

# Supplementary Materials: Integrating Straw Management and Seeding to Improve Seed Yield and Reduce Environmental Impacts in Soybean Production

Cailong Xu, Ruidong Li, Wenwen Song, Tingting Wu, Shi Sun, Weiliang Shen, Shuixiu Hu, Tianfu Han and Cunxiang Wu

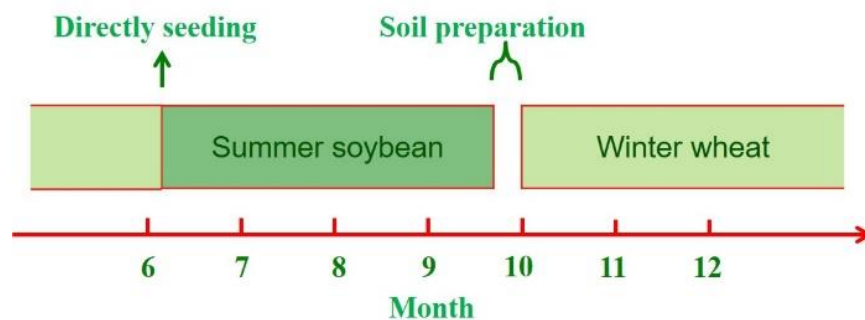

**Figure S1.** The winter wheat-summer soybean double cropping system in the Huang-Huai-Hai region of China.

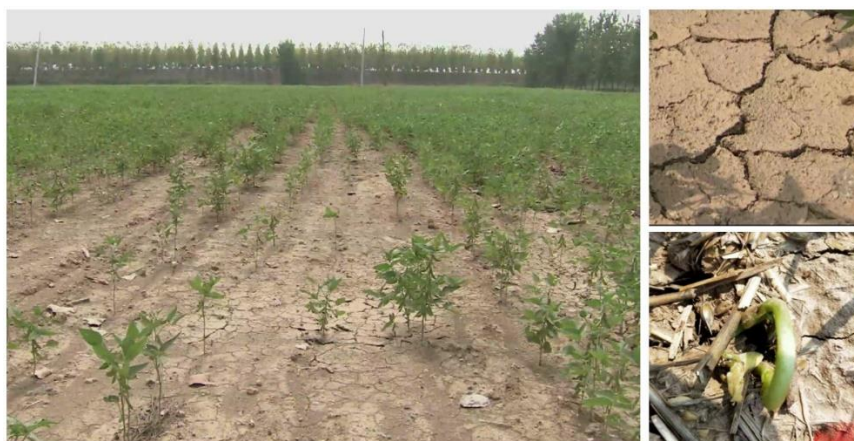

**Figure S2.** Soil crust and soybean seedlings.

**Table S1.** The soybean yield of fields using precise direct seeding plus straw mulching cultivation technique in demonstration plots in the Huang-Huai-Hai region.

| Year                 | Plot                | Geographic Coordinates | Harvest Area<br>(666.67 m <sup>2</sup> ) | Soybean Yield<br>(kg ha <sup>-1</sup> ) |
|----------------------|---------------------|------------------------|------------------------------------------|-----------------------------------------|
| 2012                 | Shunyi, Beijing     | E116.65°, N40.13°      | 10.0                                     | 4218.5                                  |
| 2013                 | Xinxiang, Henan     | E113.91°, N35.37°      | 3.4                                      | 4668.6                                  |
| 2014                 | Xinxiang, Henan     | E113.91°, N35.37°      | 1.2                                      | 4229.3                                  |
| 2015                 | Xinxiang, Henan     | E113.91°, N35.37°      | 7.0                                      | 4738.1                                  |
| 2016                 | Xinxiang, Henan     | E113.91°, N35.37°      | 4.2                                      | 4591.5                                  |
| 2016                 | Xinxiang, Henan     | E113.91°, N35.37°      | 3.3                                      | 4720.5                                  |
| 2017                 | Xinxiang, Henan     | E113.91°, N35.37°      | 2.1                                      | 4672.5                                  |
| 2017                 | Suzhou, Anhui       | E116.98°, N33.64°      | 20.5                                     | 3586.1                                  |
| 2017                 | Shijiazhuang, Hebei | E114.54°, N38.04°      | 2.8                                      | 5227.5                                  |
| 2017                 | Cangzhou, Hebei     | E116.87°, N38.31°      | 3.4                                      | 4846.5                                  |
| 2017                 | Zhengzhou, Henan    | E113.64°, N34.72°      | 3.2                                      | 4986.0                                  |
| 2018                 | Huojia, Henan       | E113.65°, N35.26°      | 4.5                                      | 4562.3                                  |
| 2018                 | Yuanyang, Henan     | E113.94°, N35.07°      | 2.1                                      | 5021.0                                  |
| 2018                 | Xinxiang, Henan     | E113.91°, N35.37°      | 4.9                                      | 5009.0                                  |
| 2018                 | Jiaxiang, Shandong  | E116.34°, N35.41°      | 15.0                                     | 4807.5                                  |
| 2018                 | Liangshan, Shandong | E116.10°, N35.80°      | 60.4                                     | 4338.6                                  |
| 2019                 | Xinxiang, Henan     | E113.91°, N35.37°      | 7.25                                     | 4690.1                                  |
| 2019                 | Huojia, Henan       | E113.65°, N35.26°      | 100.4                                    | 4546.5                                  |
| 2020                 | Xinxiang, Henan     | E113.91°, N35.37°      | 3.5                                      | 4518.6                                  |
| 2020                 | Huixian, Henan      | E113.81°, N35.46°      | 110.1                                    | 4638.0                                  |
| Average              |                     |                        |                                          | 4630.8                                  |
| Variable coefficient |                     |                        |                                          | 7.8%                                    |
